# Supplementary material for: WITHDRAWN: Impact of Preoperative Anemia on Surgical Outcomes in Endonasal Transsphenoidal Surgery for Pituitary Adenoma: A Matched-Cohort Study
Source: Research Square preprint supplement (doi:10.21203/rs.3.rs-7106657/v1), 2025-07-22
Supplement: Supplementary file 1 [file 9333819899cca4bf7fe4606f.docx]

Supplementary Table 1. Query codes for diagnoses and procedures

| Diagnosis | System | Code |
| --- | --- | --- |
|
| Pituitary tumor | ICD-10 | D35.2 |
| ICD-O | 8272/0 |
| Neuroendoscopy with excision of pituitary tumor, trans-sphenoidal approach | CPT | 62165 |
| Anemia | ICD-10 | D63  D64 |
| Hematocrit | LOINC | 9013  4544-3 |
| DM | ICD-10 | E11 |
| Cardiovascular medication use | CPT | CV000 |
| Overweight and obesity | ICD-10 | E66 |
| Hyperlipidemia | ICD-10 | E78 |
| Hypopituitarism | ICD-10 | E23 |
| Steroid supplements | CPT | HS050 |
| Thyroid supplements | CPT | HS850 |
| Visual disturbance | ICD-10 | H53-H54 |
| CSF leak | ICD-10 | G96.8 |
| Meningitis | ICD-10 | G03 |
| Lumbar drain | CPT | 1009341 |
| Shunt procedure | CPT | 1009323 |
| Diabetes insipidus | ICD-10 | E23.2 |
| Desmopressin/vasopressin use | CPT | HS702 |
| SIADH/Hyponatremia | ICD-10 | E22.2  E87.1 |

Supplementary Table 2 Propensity matching models

| Models | Model 1 | Model 2 | Model 3 |
| --- | --- | --- | --- |
| Matching variables | Age | Age | Age |
| Gender | Gender | Gender |
| Race | Race | Race |
|  | DM | DM |
| Cardiovascular medication use | Cardiovascular medication use |
| Overweight and obesity | Overweight and obesity |
| Hyperlipidemia | Hyperlipidemia |
|  | Hypopituitarism |
| Visual disturbance |
